# Supplementary material for: Human BLCAP transcript: new editing events in normal and cancerous tissues
Source: PubMed Central journal article supplement (PMC2958456; doi:10.1002/ijc.25022), 2009-11-11
Supplement: ijc0127-0127-SD1.pdf [file ijc0127-0127-SD1.pdf]

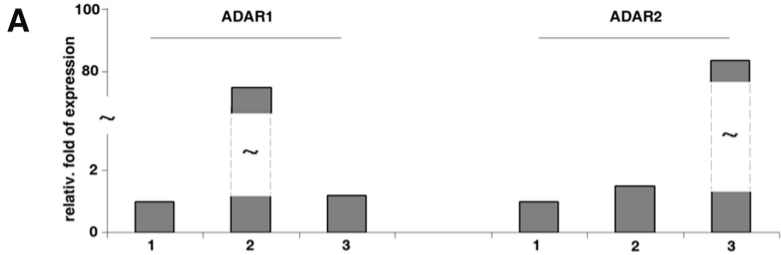

**B**

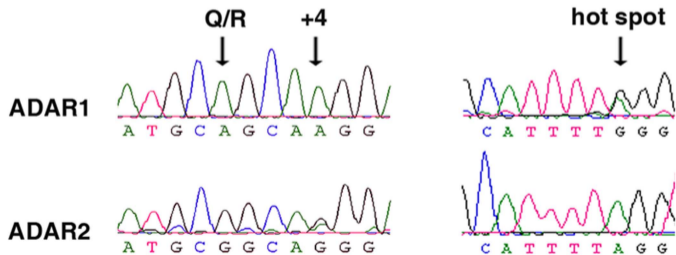

Figure 1S

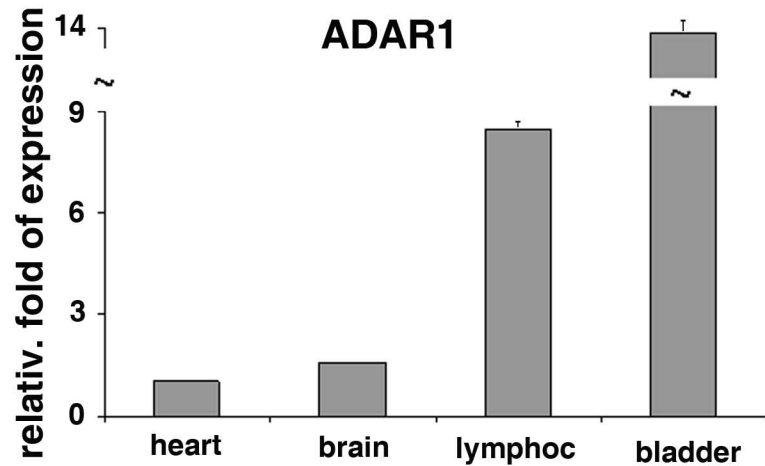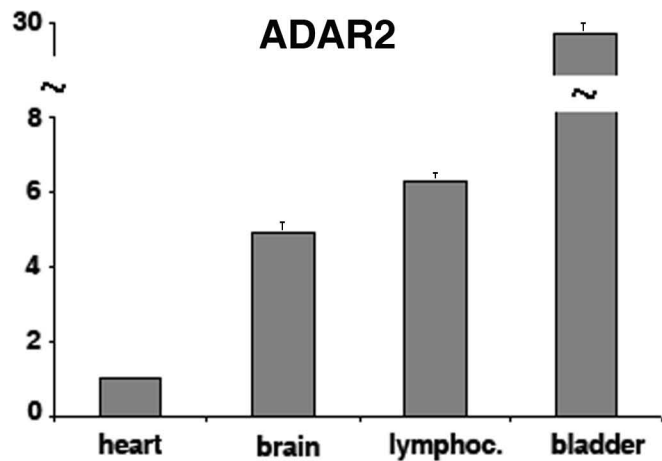

Figure 2S

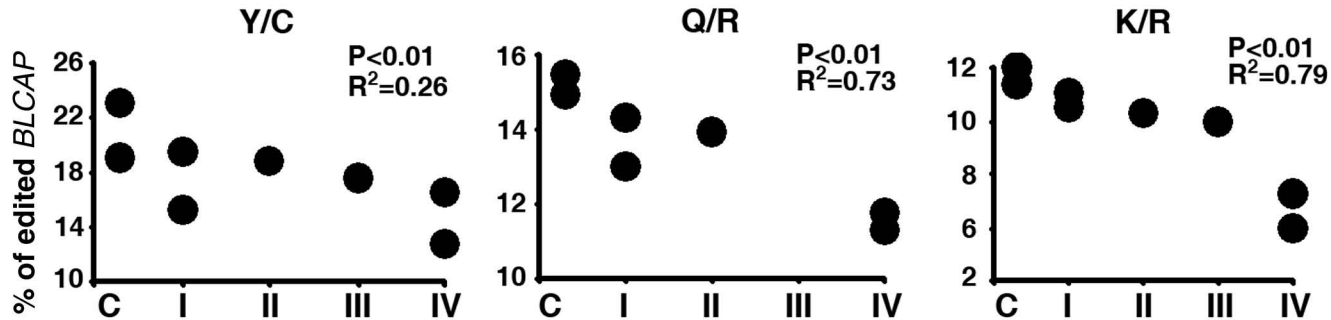

Figure 3S
